# Supplementary material
Source: Springer Nature journal article supplement (https://www.springermedizin.de/resource/supplementary/13017_2008_120_MOESM1_ESM.pdf/9635512)

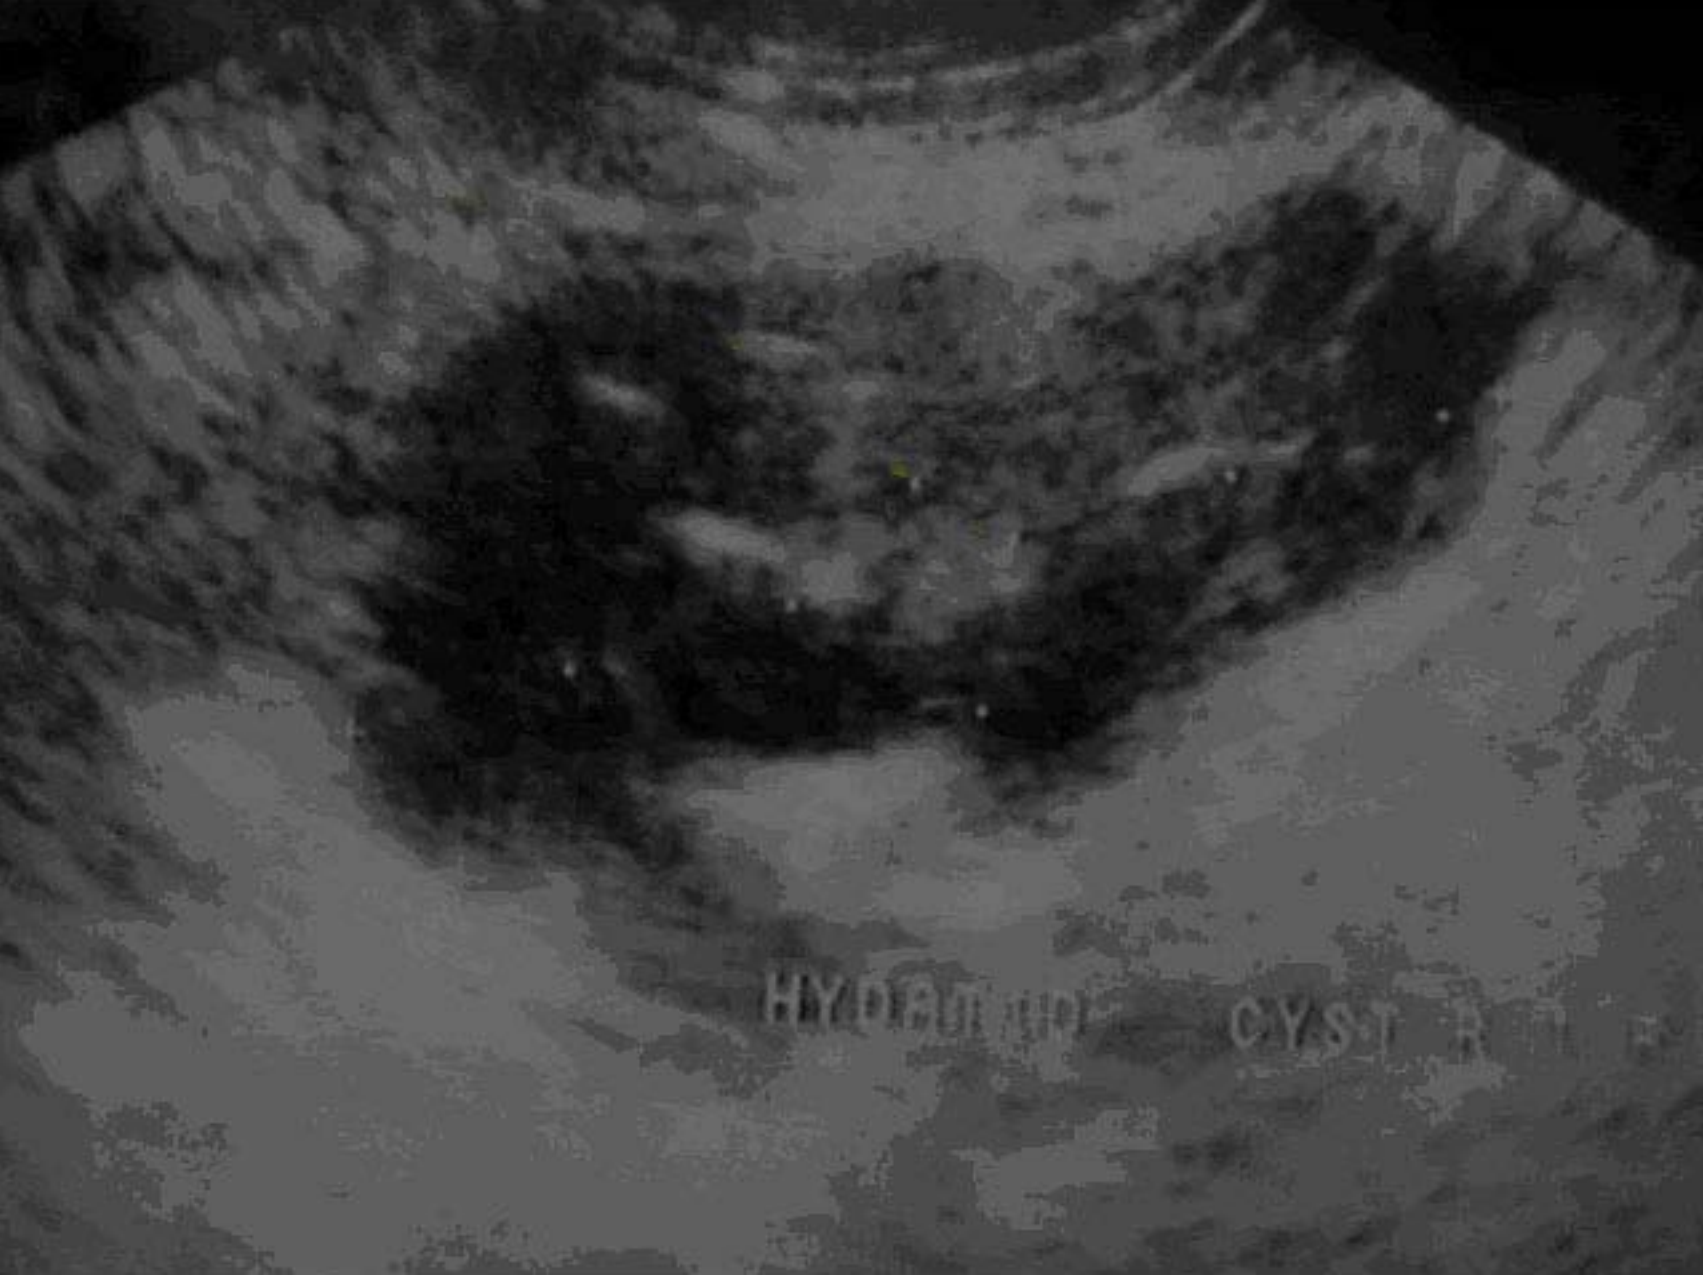

HYDROCEPHALUS

CYST

Supplement: MOESM1 [file 9635512]
